# Supplementary material for: Sub-micron poly(N-isopropylacrylamide) particles as temperature responsive vehicles for the detachment and delivery of human cells
Source: Royal Society of Chemistry journal article supplement (doi:10.1039/b909656f), 2009-01-01
Supplement: b909656f.pdf [file b909656f.pdf]

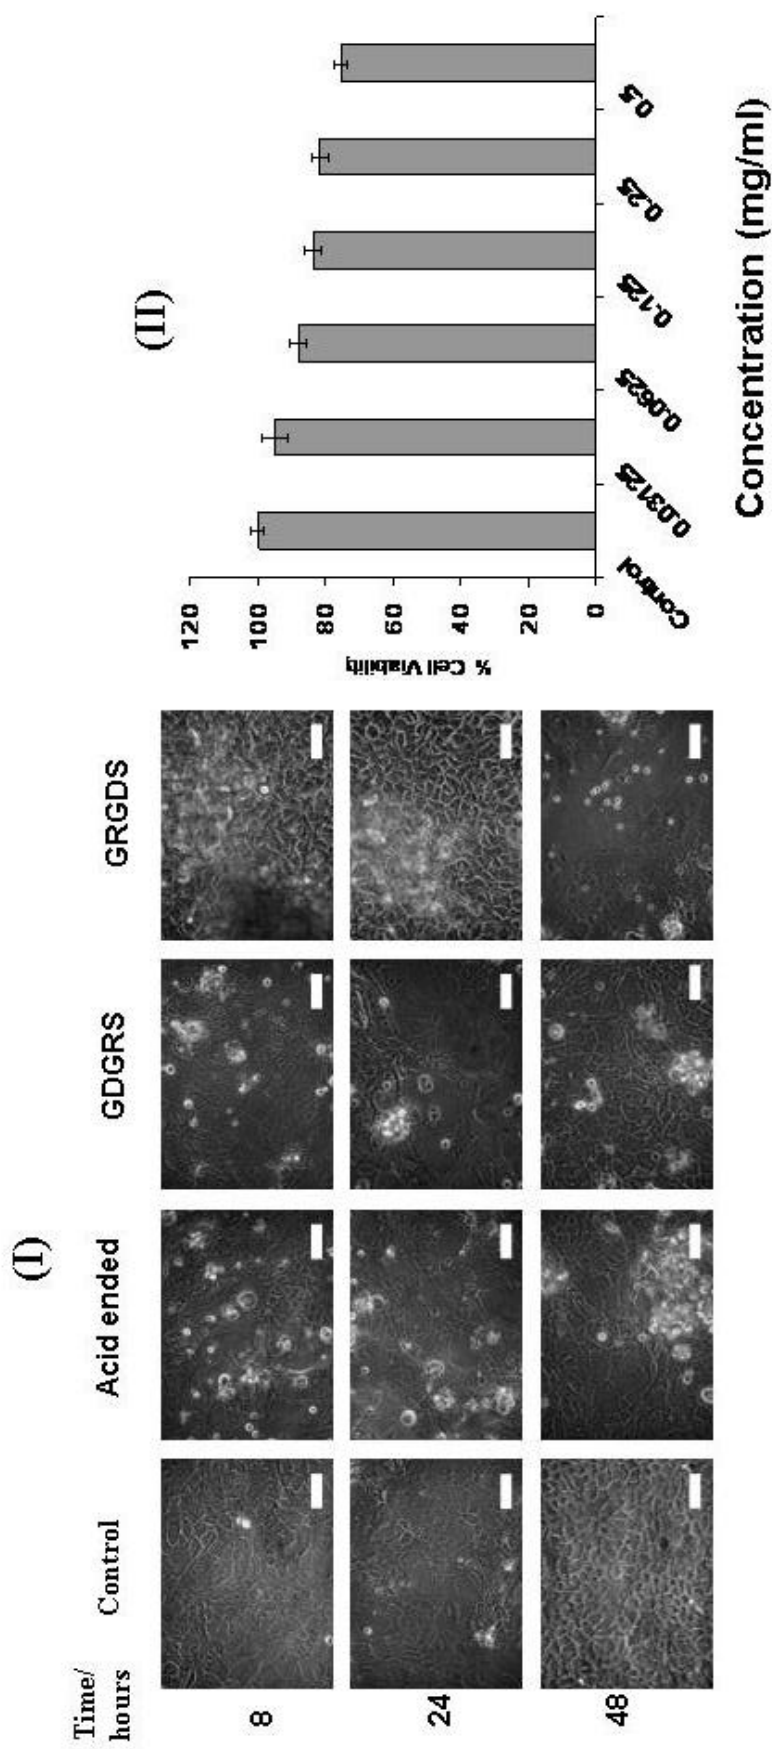

**Figure ESI 1** (I) Micrographs showing keratinocytes in contact with HB-NIPAM-GRGDS, HB-NIPAM-GDGRS or HB-NIPAM. The images show that the cells were resistant to removal by each of the polymers and (II) cell viability data (MTT) showing a negligible decrease in viability on exposure to HB-NIPAM-GRGDS at various concentrations.
